# Supplementary material
Source: HighWire-hosted journal article supplement (http://www.ajnr.org/highwire/filestream/52789/field_highwire_adjunct_files/0/15-00765.pdf)
Supplement: 15-00765.pdf [file 15-00765.pdf]

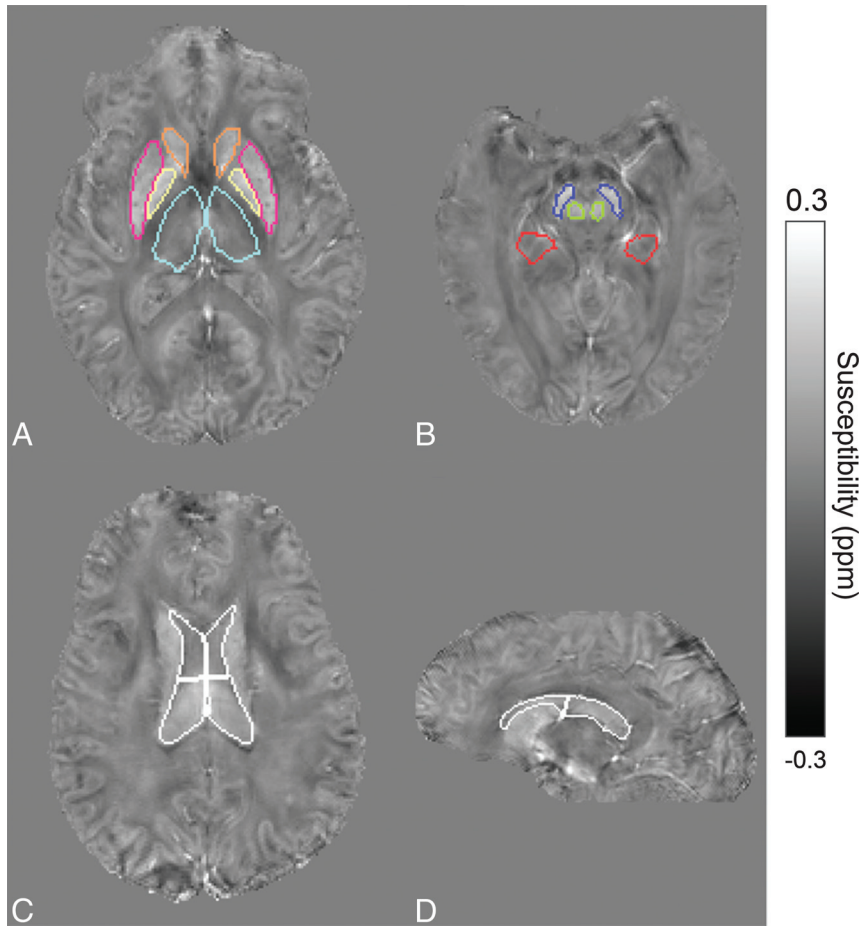

**ON-LINE FIGURE.** Sample axial section (A) of the QSM image in a healthy control with selected uneroled ROIs for the caudate nucleus (orange), putamen (pink), globus pallidus (yellow), and thalamus (cyan). ROIs in a lower section (B) show the substantia nigra (blue), red nucleus (green), and hippocampus (red). The ROIs used for the QSM reference area in the lateral ventricles are shown on axial (C) and sagittal (D) sections.
